# Supplementary material
Source: Springer Nature journal article supplement (https://www.springermedizin.de/resource/supplementary/12913_2009_1209_MOESM2_ESM.pdf/9528402)

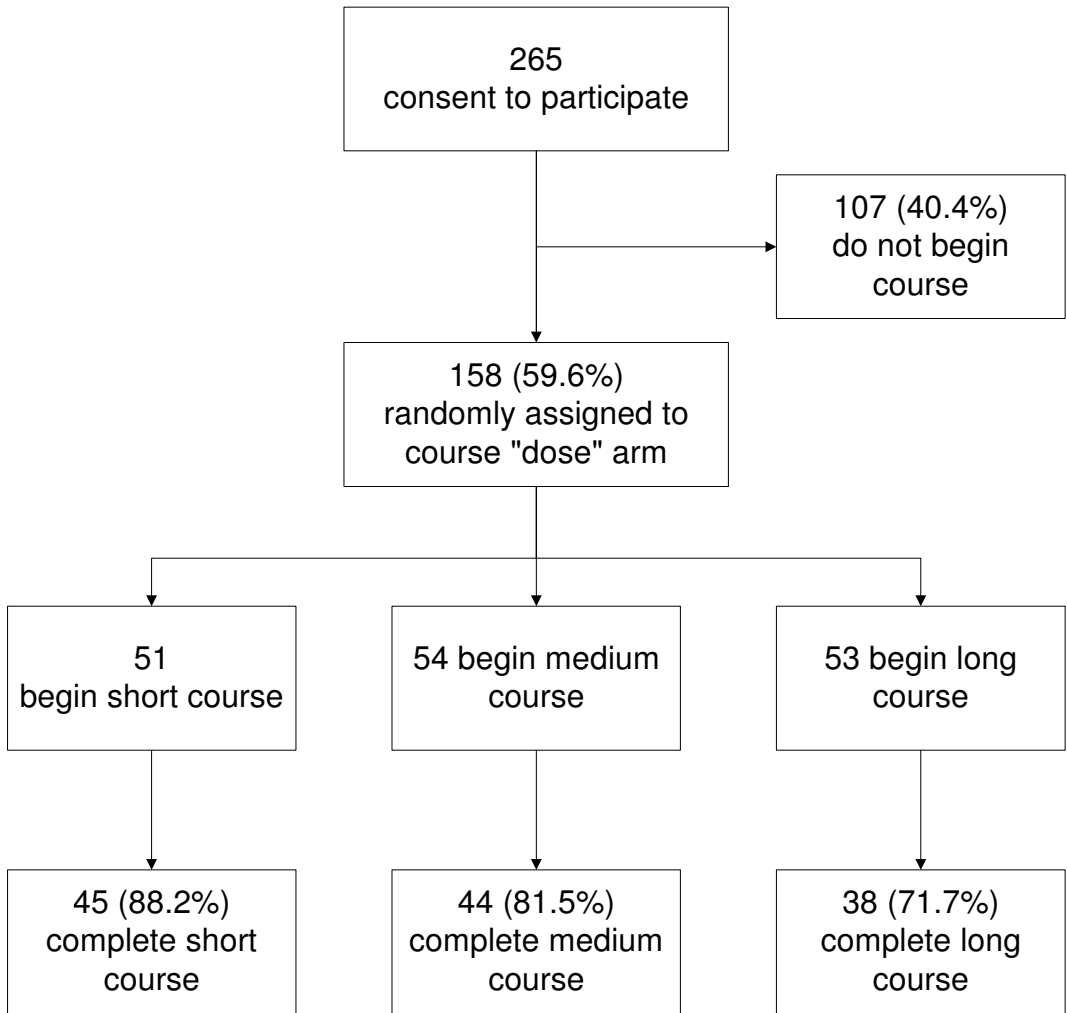

Supplement: MOESM2 [file 9528402]
